# Supplementary material for: Lymphangiogenesis and Lymphatic Remodeling Induced by Filarial Parasites: Implications for Pathogenesis
Source: PubMed Central journal article supplement (PMC2781552; doi:10.1371/journal.ppat.1000688), 2009-12-11

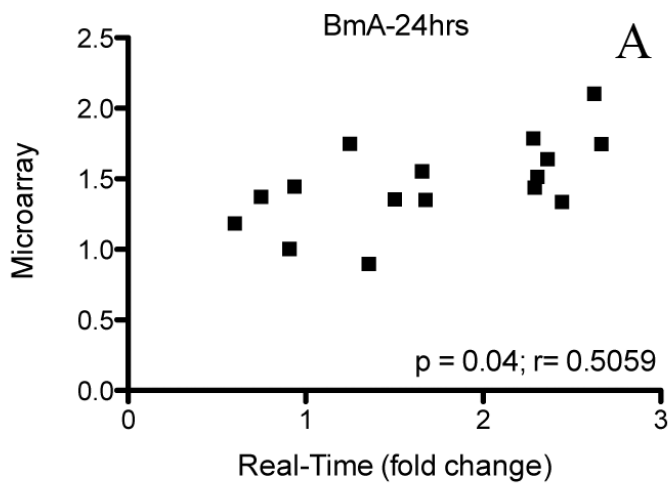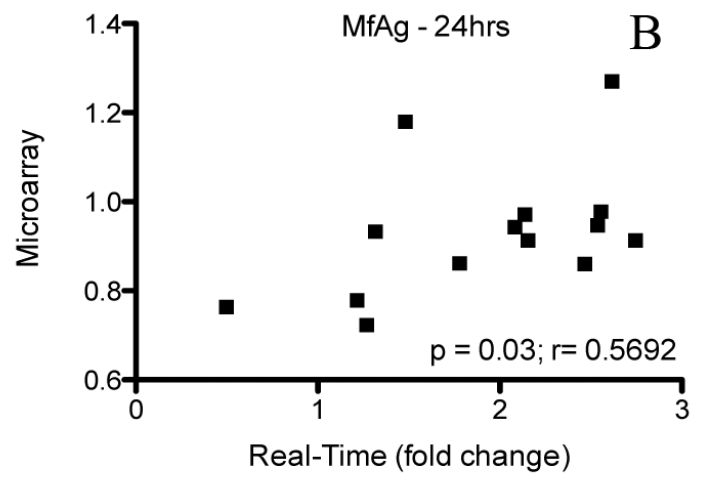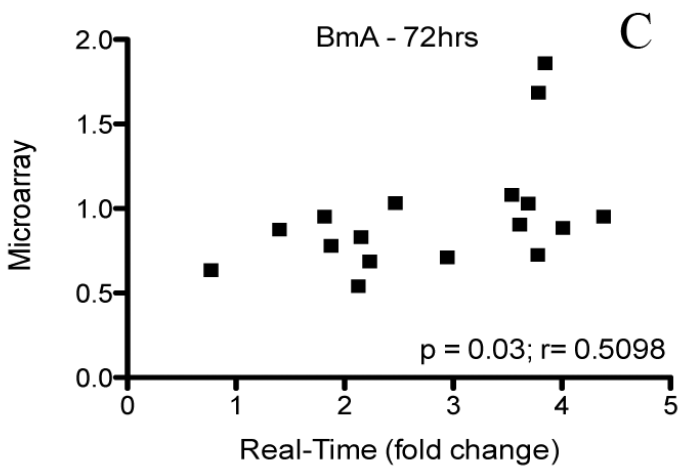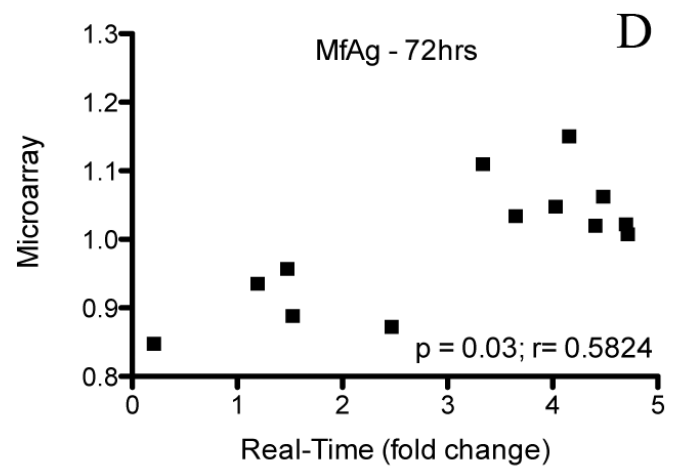

Supplement: ppat.1000688.s002.pdf [file ppat.1000688.s002.pdf]
